# Supplementary material
Source: publisher figshare collection journal article supplement (https://diabetesjournals.figshare.com/ndownloader/files/27508067)
Supplement: Supplementary file 1 [file 27508067]

## Sheet: Sheet1
sample	source	sex	age	ancestry	RIN	weight.kg	height.in	BMI
AAFH472	NDRI	F	69	C	.	93	64	35.2
AAFI274	NDRI	F	52	C	.	61.7	64	23.3
ABCU196	NDRI	F	41	B	.	94	66	33.44
ABEI419	NDRI	M	57	C	.	100	72	29.89
ABFG272	NDRI	M	49	O	.	88	68	29.49
ABG2361	NDRI	F	52	C	.	99	66	34.95
ABGA416	NDRI/ MIAMI	F	44	C	.	95	74	26.89
ABJL185	NDRI	F	70	C	.	45.5	66	16.19
ABKA304	NDRI	F	37	C	NA	78	62	31.45
ABKI404	NDRI	F	46	C	NA	57	64	21.57
ACAF166	NDRI	M	38	H	NA	98	69	31.92
ACAP236	NDRI	M	21	C	NA	123	70	38.92
ACEK420	NDRI	F	53	C	NA	60	NA	NA
ACEQ383	NDRI	M	41	B	NA	95.3	71	29.3
ADAC418	NDRI	F	43	C	NA	101	71	31.08
HP2184	NDRI	M	42	H	NA	90	75	24.8
HP2191	NDRI	F	53	C	NA	60	65	23.8
HP2200	NDRI	F	42	A	NA	55.8	65	20.44
TBB055	ICR/SCIC	M	28	H	8.8	94.5	70	29.8
TF1232	ICR/SCIC	F	43	B	8.1	75	65	27.5
TGH282	NDRI	M	48	C	7.5	68	69	22.1
TGY436	ICR/WASH U	M	42	C	9.1	96	66	34
TH4128	ICR/WASH U	M	40	C	6.7	84.1	70	26
TH5160	NDRI	M	52	C	8.6	96	74	27.2
TJ1029	NDRI	F	52	C	8.2	63	64	23.8
TJA073	JDRF/WASH U	M	43	H	7.8	90.9	68	30
TJE083	NDRI/U Illinois	M	53	C	8.7	92	71	28.3
UBS172	JDRF/WASH U	M	58	C	7.1	102	72	30
UBT342	NDRI/U Illinois	M	52	C	7.3	88	70	28.1
UBZ379	ICR/WASH U	M	57	C	7.4	93	71	28
UCO492	ICR/U WISC	M	46	C	7.6	99.9	67	34.4
UEP0317	ICR/ S CAL	M	37	C	8.3	90.6	73	26.5
UF3003	ICR/U ALABAMA	M	22	B	7.3	.	.	26.76
UG3360	ICR/U ILLINOIS	F	37	C	7.4	.	.	24
UGQ298	ICR/SCIC	M	56	C	8	100	77	26.1
UHI140	ICR/ U MINN	F	23	C	8.1	99.6	64	37.7
UJG192	ICR/ S CAL	F	52	C	8.6	77.3	62	31.1
UK2184	ABCC/U WISC	M	44	.	7.4	.	.	24.5
UKI217	ABCC/U MINN	F	58	B	7.9	67.2	64	25.2
ULI102	JDRF/WASH U	M	54	C	8	98	66	30
ULM047	ABCC/U PENN	M	56	C	8.3	72.72	70	23
VA2103	ABCC/U MINN	M	42	C	8.3	84.8	70	26.8
VAD335	ABCC/U MINN	F	41	H	8.4	79	63.8	30.1
VB3063	JDRF/WASH U	M	58	B	8	96.1	71	29.5
VBL403	JDRF/WASH U	F	51	C	7.5	70	66.9	24.2
VBS118	ABCC/U MINN	F	42	C	6.5	107.3	67	37
VC2154	ABCC/NW U	M	51	C	6.7	77.1	70.9	23.7
VCH422	ABCC/U PENN	M	55	H	8.5	68	66.9	23.5
VD3037	JDRF/WASH U	M	47	C	6.9	132	76	35.4
VDB248	ABCC/S CAL	M	44	H	7.2	90.7	65	33.3
VDH041	JDRF/WASH U	F	59	C	7.3	63.8	64	24.1
VDZ067	NDRI	F	26	C	6.6	65	67	22.4
VEF019	ABCC/U MIAMI	F	42	C	8.9	72.7	64	27.5
VEM410	ABCC/S CAL	M	36	C	8.5	113.6	73	33
VEY129	ABCC/NW U	M	40	C	7.5	69	69	22.5
VFM167	ABCC/U WISC	F	46	C	7.4	67	61.8	27.2
VFT204	ABCC/U PENN	F	22	B	.	60	61	25
WBB020	NDRI/U Illinois	M	36	C	.	78.18	70	24.74
WHY272	NDRI/U Illinois	M	32	C	6.5	69.5	66	24.7
XAK069	NDRI	F	38	C	7.9	75.9	65	27.8
XEC010	NDRI	F	47	C	8.5	68.2	68	22.9
XFK356	NDRI/U Illinois	M	63	B	9	73	71	22.4
XFS109	NDRI/U Illinois	F	35	C	7.5	79.5	64	30
XJY097	NDRI	F	57	C	6.8	63	61	26.25
XK2367	NDRI	F	54	C	.	64	67	22.1
XKG309	NDRI/U Illinois	M	62	C	NA	NA	NA	NA
YAR273	NDRI/U Illinois	F	42	C	7.4	93	67	32.11
YGO136	NDRI	M	39	H	6.9	75	71	23.08
YHM329	NDRI/ MIAMI	F	31	B	7	81.4	65	29.82
YHN107	NDRI	M	51	C	7.7	90.9	70	28.8
ZHE289	NA	M	40	C	6.9	.	.	.
